# Supplementary material
Source: publisher figshare collection journal article supplement (https://sage.figshare.com/ndownloader/files/23804912)
Supplement: Supplementary file 1 [file 23804912]

# SUPPLEMENTARY MATERIAL

## Cost of Adjudication Questionnaire:

### Introduction

This short questionnaire asks for information about the resources required for outcome adjudication in your trial. Please try to answer the questions as fully and as accurately as possible. These data will form the basis of a planned paper on cost-effectiveness of adjudication which you will be invited to co-author in due course.

If you have any questions please contact Peter Godolphin on [peter.godolphin@nottingham.ac.uk](mailto:peter.godolphin@nottingham.ac.uk).

### Email address

*Enter email*

### 1. Trial name

*Dropdown option*

### Adjudication

This section collects information about who the adjudicators were, time required to adjudicate events, and adjudicators' approximate salary.

### 2. How many events were adjudicated in your trial?

*Free text (must be number)*

### 3. For the events in Q2, was each event adjudicated...

*Once*

*Twice*

*Other (please specify)*

**4. Please list the profession of the adjudicators (tick all that apply)**

*Medically qualified health professional*

*Other health professional*

*Not a health professional*

*Other (please specify)*

**5. For professions ticked in Q4, what was the approximate total number of adjudications completed by each? (Please give a number or a percentage)**

*Free text*

**6. On average, how much time did each adjudication require? (Please take into account accessing files, asking for further information and actual time adjudicating)**

*Free text*

**7. For professions ticked in Q4, what is the approximate annual salary in today's costs for each? (Please include currency)**

*Free text*

**8. Additional comments or information about this section**

*Free text*

**Disagreements**

This section is about disagreements between adjudicators, how long these took to resolve and who it involved. If disagreements were not possible (each event only adjudicated once) or there were no disagreements between adjudicators in your trial then please skip this section.

**9. How many adjudicated events resulted in a disagreement between adjudicators? (Please give a number, or percentage)**

*Free text*

**10. How many people were involved in resolving each disagreement?**

2

3

*Other (please specify)*

**11. On average, how much time did each adjudicator spend resolving each disagreement?**

**(Please take into account time for further adjudication, discussion or consensus decision)**

*Free text*

**12. Additional comments or information about this section**

*Free text*

## **Comments**

**13. Please give any further comments, or information about any costs not covered in the above questions.**

*Free text*

**Supplementary Table 1:** Summary of included trials primary outcome and adjudication process

| <b>Trial name</b> | <b>Description of primary outcome</b>                                                     | <b>Description of how events were chosen for the adjudication process</b>                                                    |
|-------------------|-------------------------------------------------------------------------------------------|------------------------------------------------------------------------------------------------------------------------------|
| CABACS            | Stroke or death from any cause                                                            | Adjudicators reviewed events reported by unblinded site investigators.                                                       |
| ESPRIT            | Non-fatal stroke, non-fatal MI, major bleeding complication or death from vascular cause. | Adjudicators reviewed events reported by unblinded site investigators.                                                       |
| FASTEST           | Recurrent stroke                                                                          | Adjudicators reviewed events reported by unblinded site investigators.                                                       |
| HAEST             | Recurrent ischaemic stroke                                                                | Adjudicators reviewed all events believed by blinded investigators to represent an endpoint (primary or secondary endpoint). |
| J-STARS           | Stroke or TIA                                                                             | Adjudicators reviewed events reported by unblinded site investigators.                                                       |
| NASCET            | Fatal or non-fatal ipsilateral stroke                                                     | Adjudicators reviewed CT scans and details of participant's cerebrovascular history for all participants.                    |
| PROGRESS          | Fatal or non-fatal stroke                                                                 | Adjudicators reviewed events reported by blinded site investigators.                                                         |
| TARDIS            | Recurrent stroke and TIA                                                                  | Adjudicators reviewed events reported by blinded site investigators.                                                         |
| VITATOPS          | Not-fatal stroke, non-fatal MI or death from vascular cause.                              | Adjudicators reviewed events reported by blinded site investigators.                                                         |

TIA refers to Transient Ischaemic Attack, MI refers to myocardial infarction

**Supplementary Table II:** Cost of dealing with disagreements between adjudicators

| <b>Trial name</b> | <b>Number of disagreements</b> | <b>Number of adjudicators involved in resolving each disagreement</b> | <b>Time taken per adjudicator per disagreement (minutes)</b> | <b>Total time for disagreements (hours)</b> | <b>Hourly salary of adjudicators dealing with disagreements</b> |
|-------------------|--------------------------------|-----------------------------------------------------------------------|--------------------------------------------------------------|---------------------------------------------|-----------------------------------------------------------------|
| CABACS            | 0                              | NA                                                                    | NA                                                           | NA                                          | NA                                                              |
| ESPRIT            | 22                             | 1                                                                     | 5                                                            | 1.83                                        | £62.40                                                          |
| FASTEST           | 6                              | 2                                                                     | 45                                                           | 9                                           | £70.16                                                          |
| HAEST             | 0                              | NA                                                                    | NA                                                           | NA                                          | NA                                                              |
| J-STARS           | 10                             | 5                                                                     | 60                                                           | 50                                          | £47.62                                                          |
| NASCET            | 27                             | 1                                                                     | 60                                                           | 27                                          | £47.62                                                          |
| PROGRESS          | 0                              | NA                                                                    | NA                                                           | NA                                          | NA                                                              |
| TARDIS            | 169                            | 3                                                                     | 20                                                           | 169                                         | £49.40                                                          |
| VITATOPS          | 13                             | 3                                                                     | 20                                                           | 13                                          | £96.40                                                          |
